# Supplementary material
Source: Springer Nature journal article supplement (https://www.springermedizin.de/resource/supplementary/13063_2014_2353_MOESM2_ESM.pdf/9621900)
Supplement: MOESM2 [file 9621900]

**Enrollment**

**Allocation**

**Analysis**

Assessed for eligibility by clinical staff (n = ...)

Excluded (n = ...)  
Not meeting inclusion criteria (n = ...)

Information sheets sent to eligible patients and carers (n = ...)

Excluded (n =...)  
Refused to participate (n = ...)  
Other reasons (n = ...)

**Data collection T0**  
Meeting with Research Nurse at Epilepsy Clinic to check understanding, consent, and randomise. Completion of baseline questionnaires.

Allocated to intervention (n = ...)  
Received allocated intervention (n = ...)  
Did not receive allocated intervention (n = ...)

Allocated to control (n = ...)  
Received allocated intervention (n = ...)  
Did not receive allocated intervention (n =...)

**Data collection T1**  
Week 4 follow-up

Lost to follow up (n = ...)  
Discontinued intervention (n =...)

**Data collection T2**  
Week 12 follow-up

Lost to follow up (n = ...)  
Discontinued intervention (n = ...)

**Semi-structured interviews**

**Data collection T3**  
Week 20 follow-up

Analysed (n = ...)  
Excluded from analysis (n = ...) (give reasons)
